# Supplementary material for: Highly Z-Selective Horner–Wadsworth–Emmons Olefination Using Modified Still–Gennari-Type Reagents
Source: MDPI journal article supplement (doi:10.3390/molecules27207138), 2022-10-21

## Supporting information

### “Highly Z-Selective Horner-Wadsworth-Emmons Olefination Using Modified Still-Gennari Type Reagents”

Author: Ignacy Janicki\* and Piotr Kiełbasiński\*

#### Table of contents

|                   |   |
|-------------------|---|
| Time study .....  | 2 |
| NMR spectra ..... | 3 |

## Section S1. Time study

The reaction was conducted according to general procedure described in the main text. Yields were established by quantitative  $^1\text{H}$  NMR measurements with dimethyl terephthalate as an internal standard.

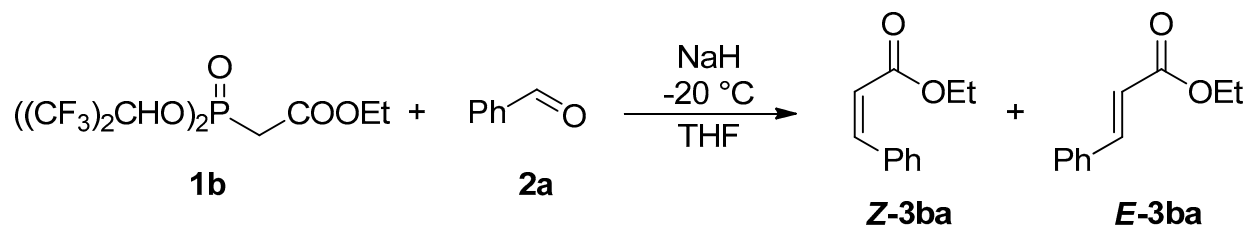

**Scheme S1.** Reaction of **1b** with **2a** – time study.

**Table S1.** Reaction of **1b** with **2a** – time study.

| entry | time [min] | yield [%] |
|-------|------------|-----------|
| 1     | 0          | 0         |
| 2     | 5          | 72        |
| 3     | 10         | 76        |
| 4     | 15         | 80        |
| 5     | 30         | 86        |
| 6     | 60         | 94        |
| 7     | 120        | 93        |

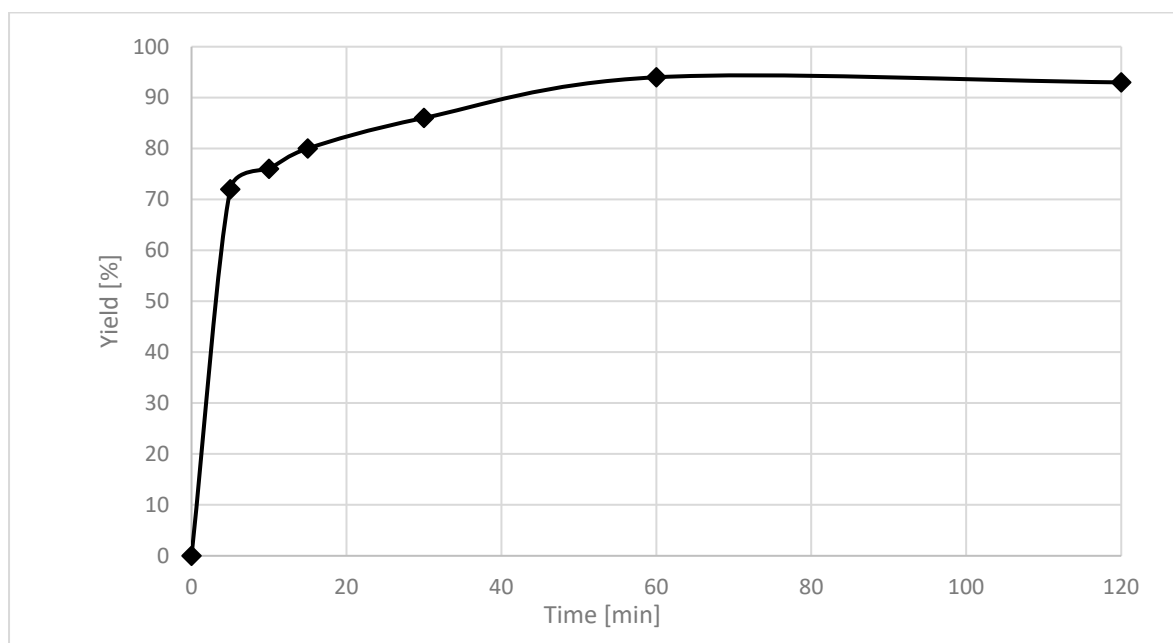

**Figure S1.** Reaction of **1b** with **2a** – time study

## Section S2. NMR spectra

The NMR spectra were recorded using a Bruker Avance Neo 400 spectrometer. All the products obtained were in agreement with the data reported in the literature,<sup>[20-24-38]</sup> therefore further chromatographic purification step was omitted and the reaction yield was calculated based on <sup>1</sup>H NMR spectra of raw extracted reaction mixture with a carefully weighed aliquot of internal standard.<sup>[23]</sup> Dimethyl terephthalate was used as an internal standard in all NMR experiments. Dimethyl terephthalate <sup>1</sup>H NMR (400 MHz, Chloroform-*d*) δ 8.10 (s, 4H), 3.94 (s, 6H). *Z:E* ratio was calculated based on *Z* and *E* products vinyl protons integration ratio.

### 1a

<sup>1</sup>H NMR (400 MHz, Chloroform-*d*) δ 5.32 – 5.17 (m, 2H), 3.78 (s, 3H), 3.29 (d, *J* = 21.6 Hz, 2H).<sup>[20]</sup>

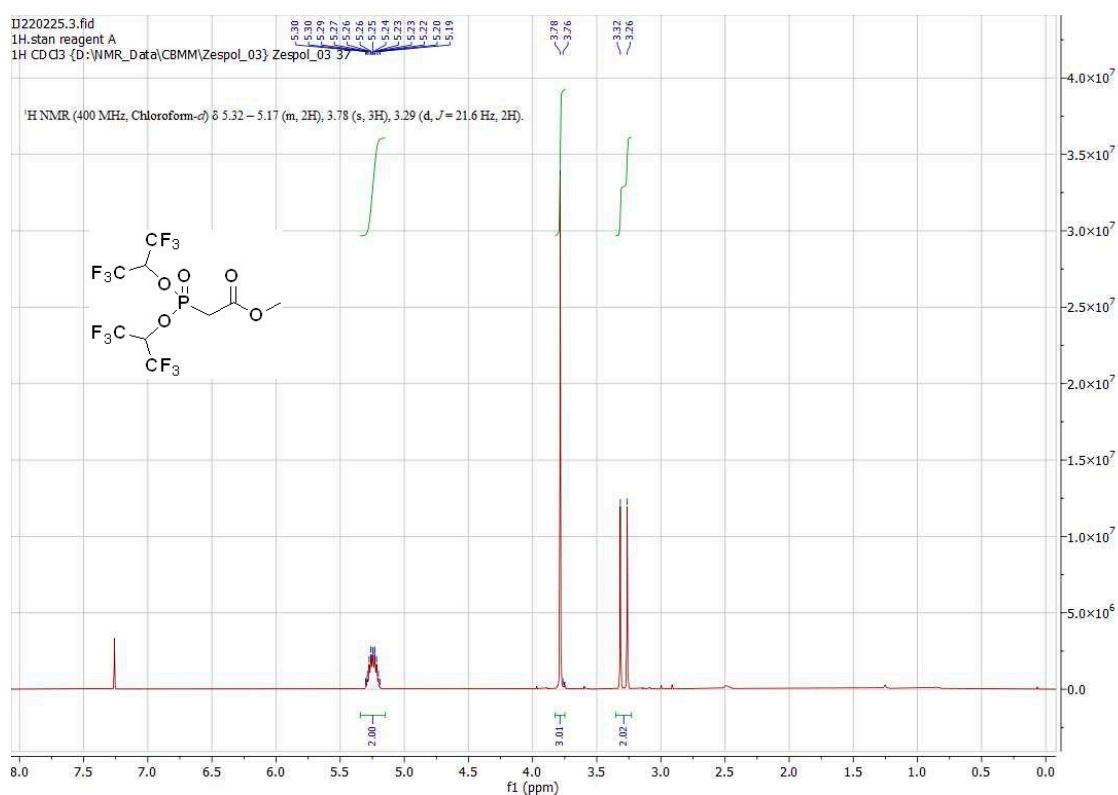

$^{31}\text{P}$  NMR (162 MHz, Chloroform-*d*)  $\delta$  25.88. [20]

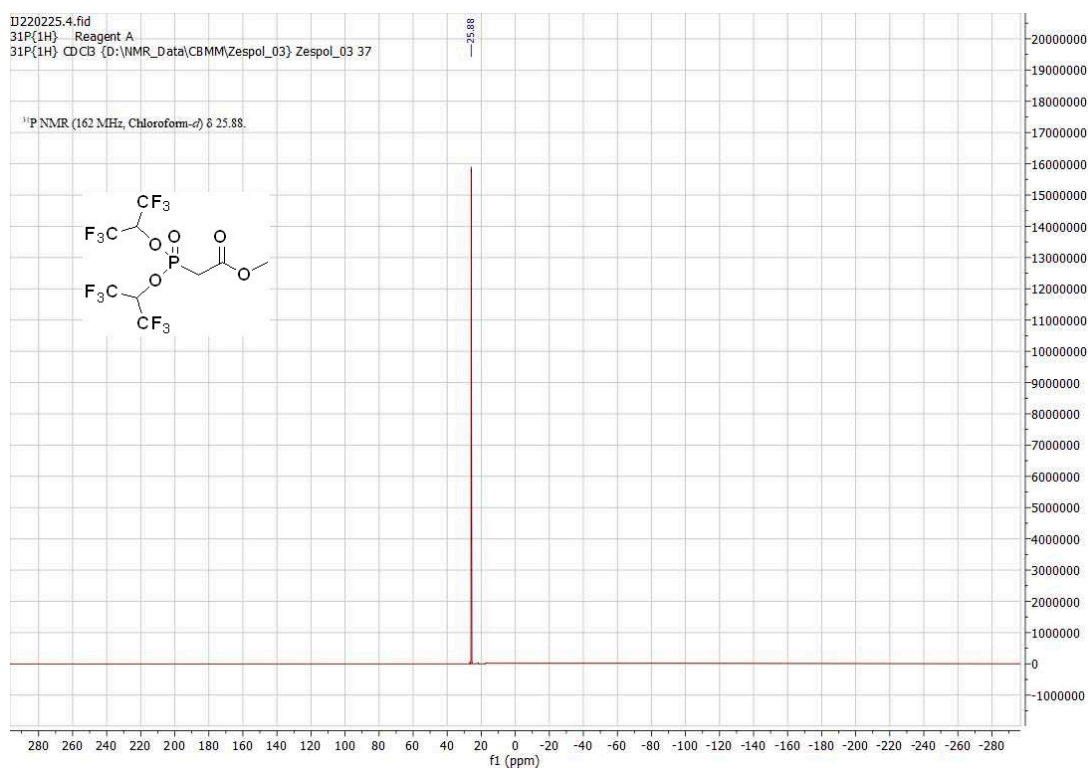

**1b**

$^1\text{H}$  NMR (CDCl<sub>3</sub>, 500 MHz):  $\delta$  = 5.35-5.17 (m, 2H), 4.23 (q,  $J$  = 7.2 Hz, 2H), 3.27 (d,  $J$  = 21.6 Hz, 2H), 1.28 (t,  $J$  = 7.2 Hz, 3H). [20]

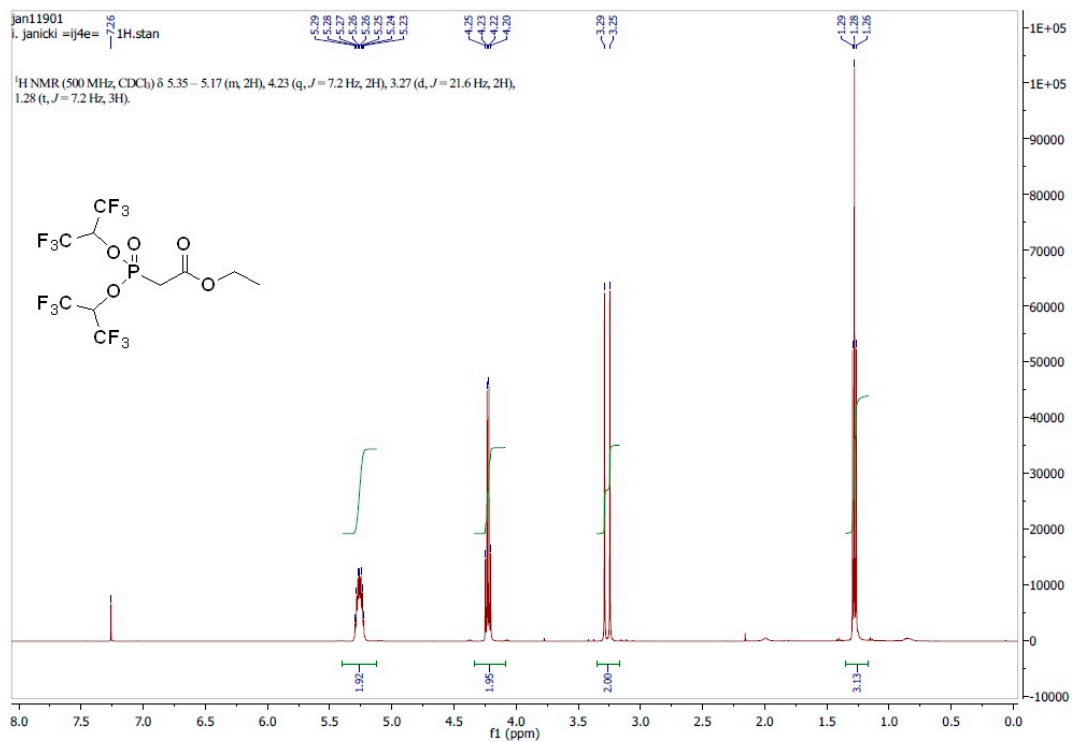



$^{31}\text{P}$  NMR ( $\text{CDCl}_3$ , 202 MHz):  $\delta = 26.25$ . [20]

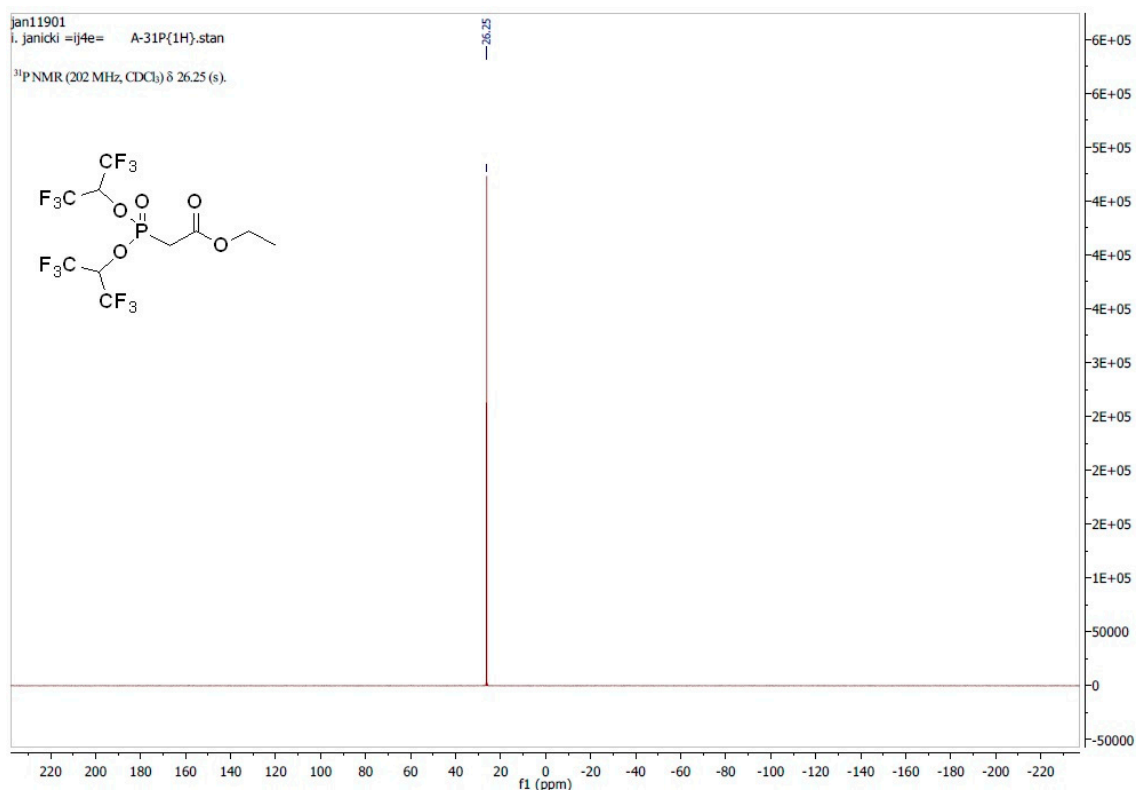

### Z-3aa

$^1\text{H}$  NMR (400 MHz, Chloroform-*d*)  $\delta$  7.64 – 7.51 (m, 2H), 7.44 – 7.29 (m, 3H), 6.96 (d,  $J = 12.6$  Hz, 1H), 5.95 (d,  $J = 12.6$  Hz, 1H), 3.71 (s, 3H). [24] 97:3 Z:E.

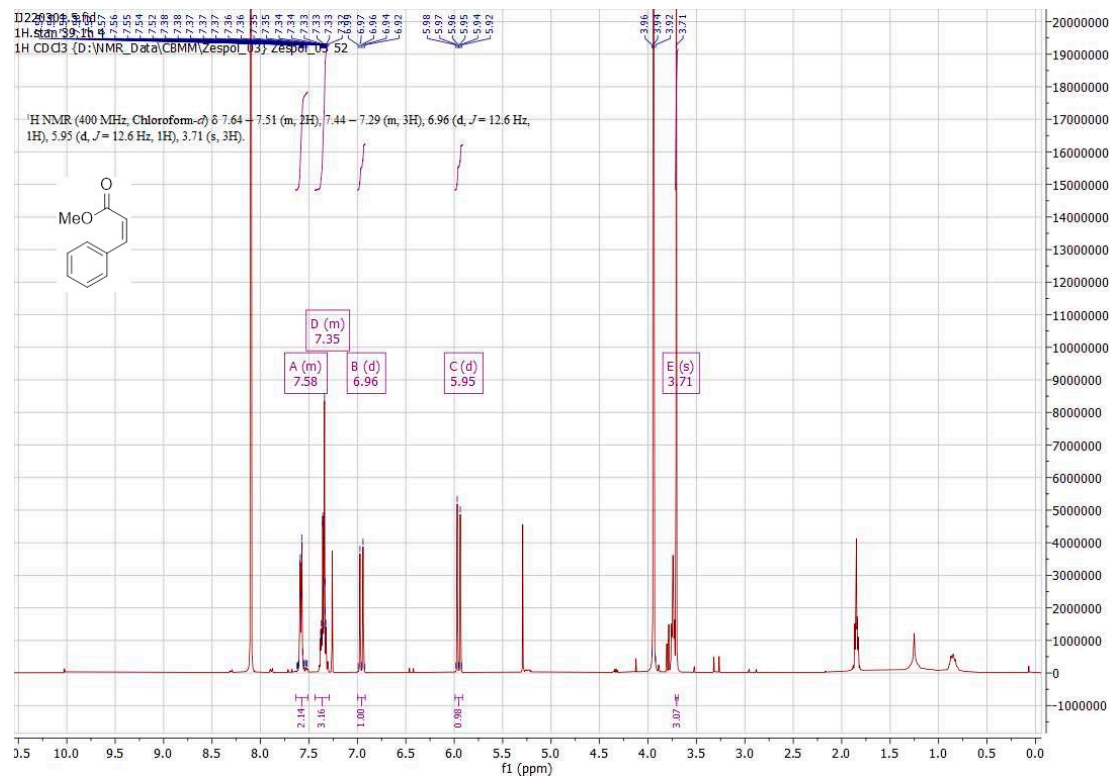

### Z-3ab

$^1\text{H}$  NMR (400 MHz, Chloroform-*d*)  $\delta$  7.54 (d,  $J$  = 8.2 Hz, 2H), 7.18 (d,  $J$  = 8.0 Hz, 2H), 6.93 (d,  $J$  = 12.7 Hz, 1H), 5.91 (d,  $J$  = 12.6 Hz, 1H), 3.73 (s, 3H), 2.38 (s, 3H). <sup>[24]</sup> 96:4 *Z:E*.

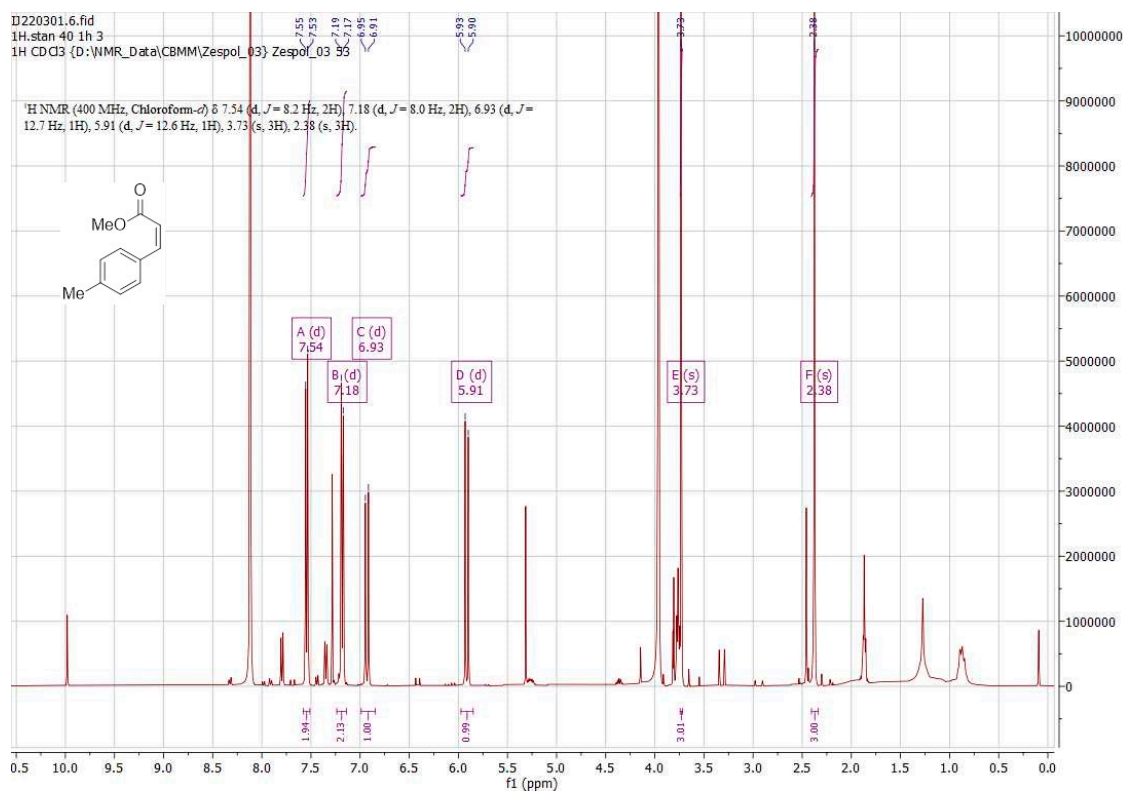

### Z-3ac

$^1\text{H}$  NMR (400 MHz, Chloroform-*d*)  $\delta$  7.47 – 7.11 (m, 4H), 6.92 (d,  $J$  = 12.6 Hz, 1H), 5.93 (d,  $J$  = 12.6 Hz, 1H), 3.70 (s, 3H), 2.35 (s, 3H). <sup>[25]</sup> 95:5 *Z:E*.

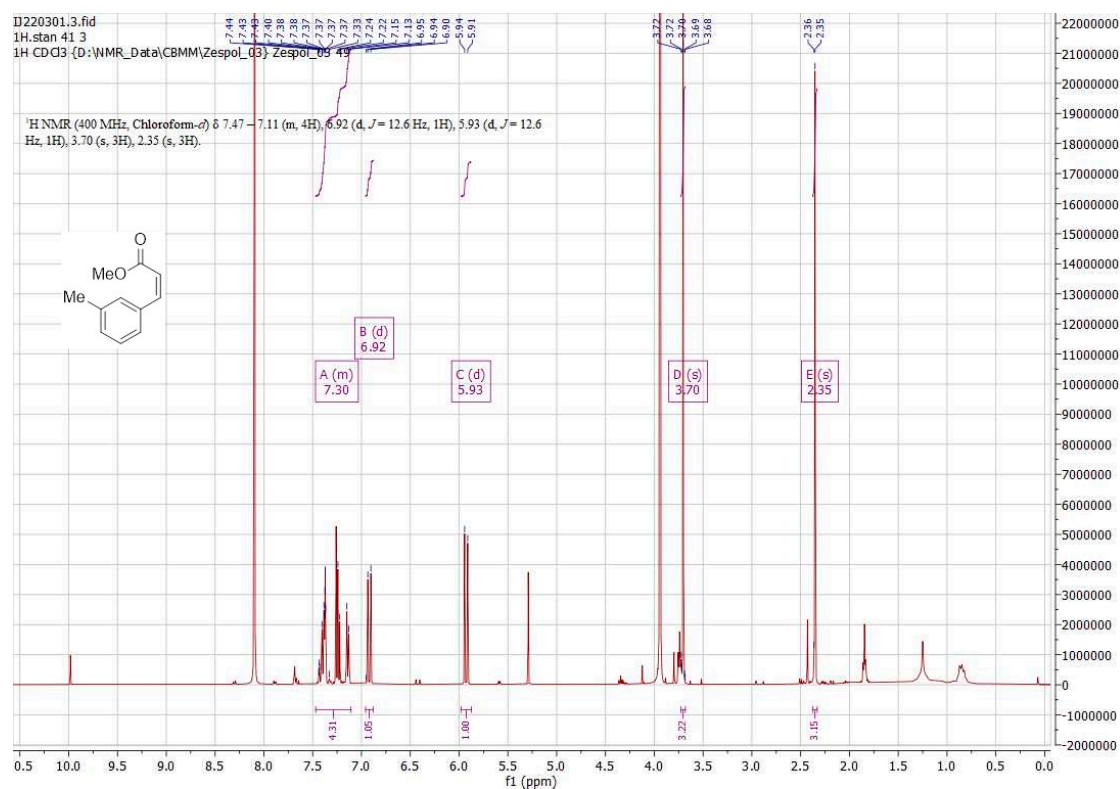

### Z-3ad

$^1\text{H}$  NMR (400 MHz, Chloroform- $d$ )  $\delta$  7.31 (d,  $J = 7.7$  Hz, 1H), 7.25 – 7.07 (m, 4H), 6.03 (d,  $J = 12.2$  Hz, 1H), 3.63 (s, 3H), 2.28 (s, 3H).  $^{[26]}$  97:3 Z:E.

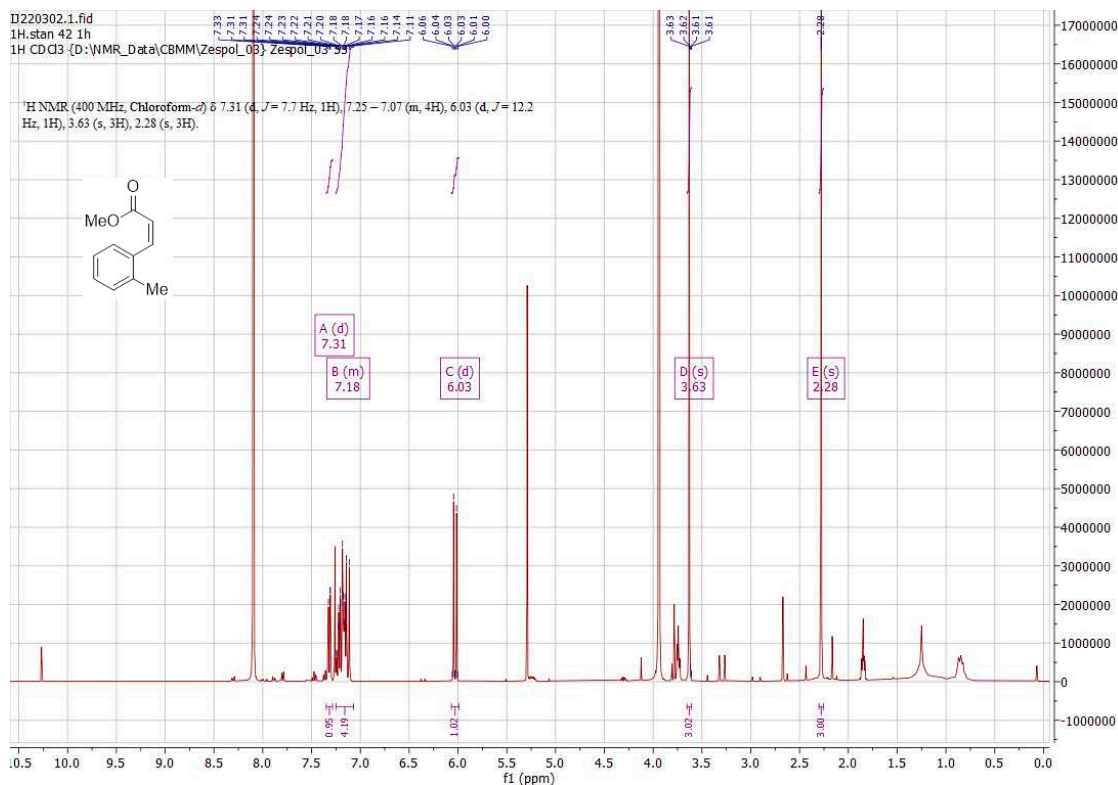

### Z-3ac

$^1\text{H}$  NMR (400 MHz, Chloroform- $d$ )  $\delta$  7.57 (d,  $J = 8.2$  Hz, 2H), 7.34 (d,  $J = 8.3$  Hz, 2H), 6.91 (d,  $J = 12.6$  Hz, 1H), 5.98 (d,  $J = 12.7$  Hz, 1H), 3.73 (s, 3H).  $^{[24]}$  95:5 Z:E.

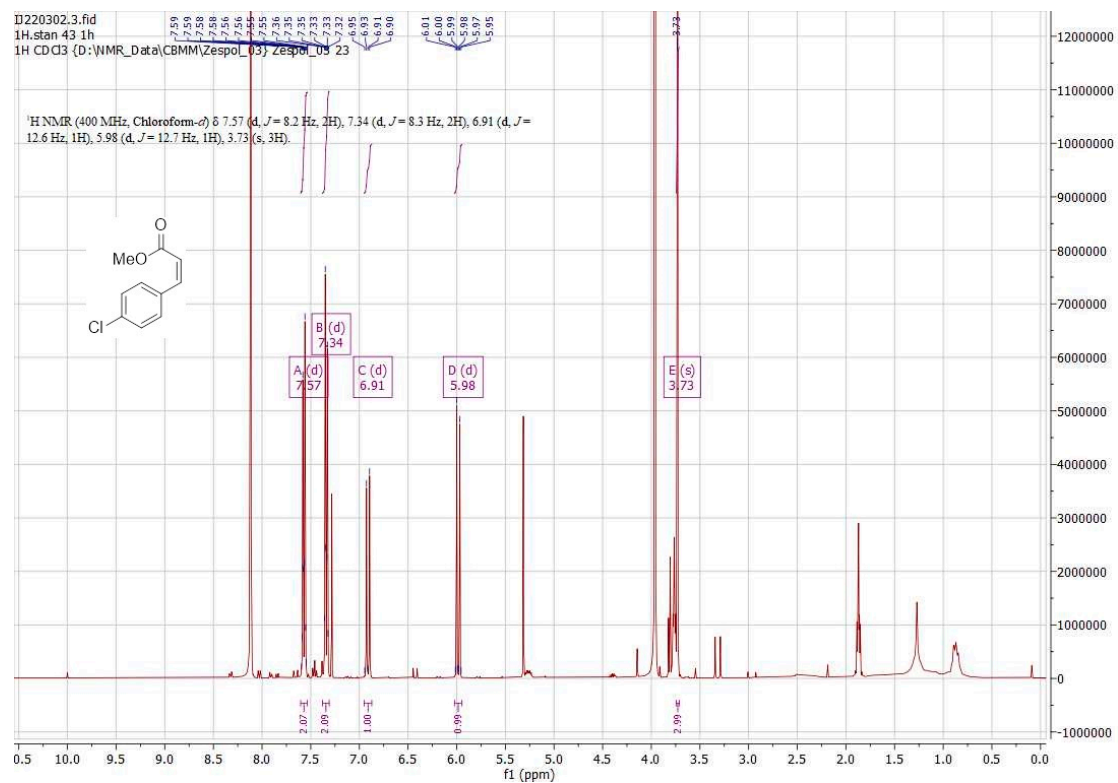

### Z-3af

$^1\text{H}$  NMR (400 MHz, Chloroform- $d$ )  $\delta$  7.47 (s, 4H), 6.86 (d,  $J$  = 12.7 Hz, 1H), 5.97 (d,  $J$  = 12.6 Hz, 1H), 3.70 (s, 3H).  $^{[24]}$  95:5 Z:E.

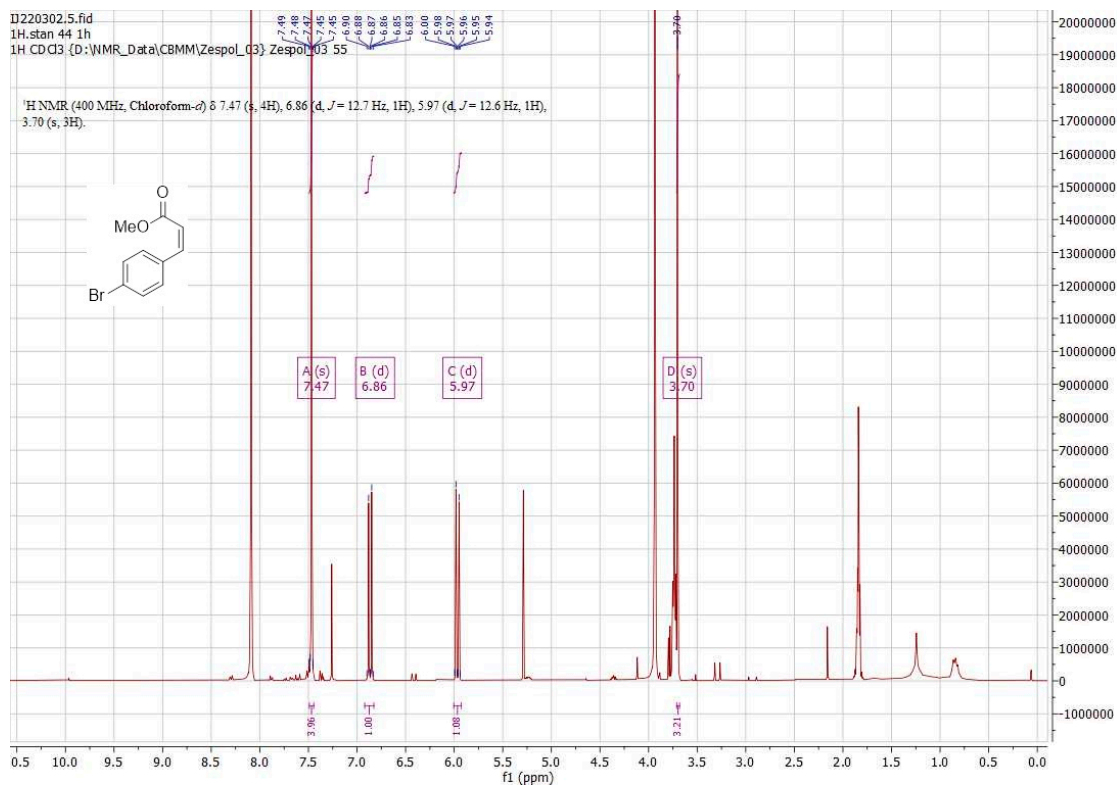

### Z-3ag

$^1\text{H}$  NMR (400 MHz, Chloroform- $d$ )  $\delta$  8.22 (d,  $J$  = 8.9 Hz, 2H), 7.69 (d,  $J$  = 8.6 Hz, 2H), 7.04 (d,  $J$  = 12.5 Hz, 1H), 6.15 (d,  $J$  = 12.5 Hz, 1H), 3.73 (s, 3H).  $^{[24]}$  94:6 Z:E.

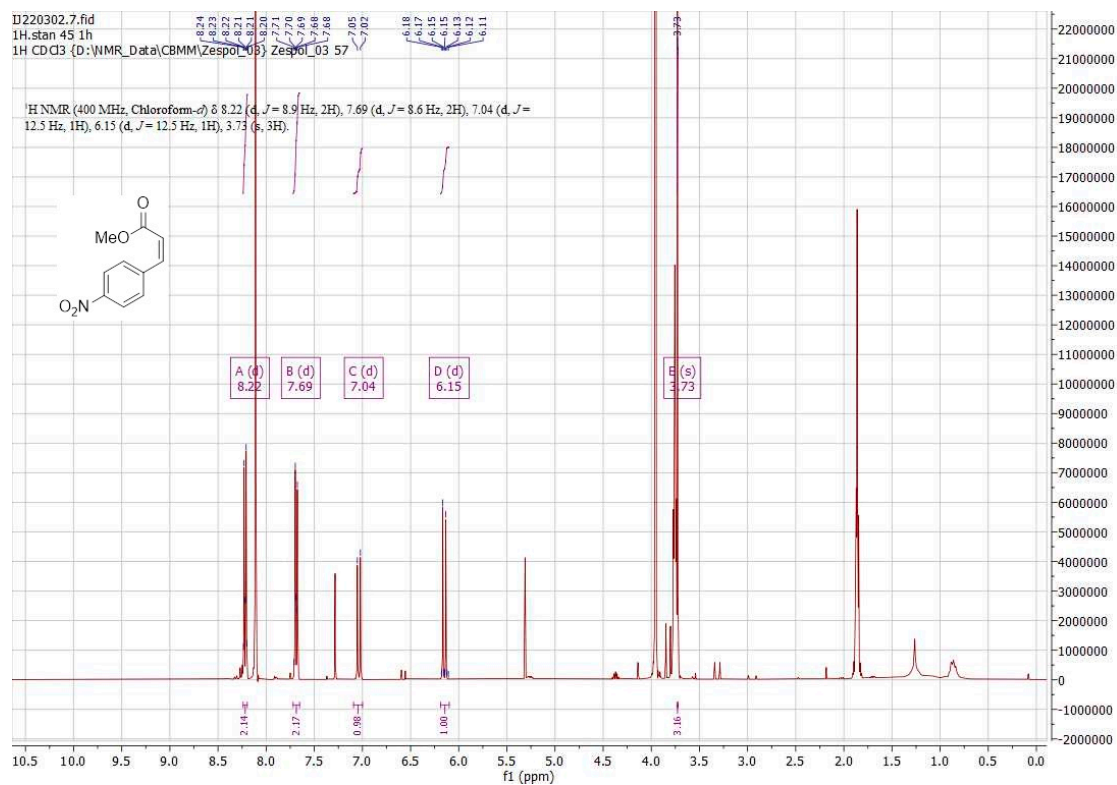

### Z-3ah

$^1\text{H}$  NMR (400 MHz, Chloroform-*d*)  $\delta$  7.68 (d,  $J = 3.6$  Hz, 1H), 7.47 (d,  $J = 1.7$  Hz, 1H), 6.79 (d,  $J = 12.9$  Hz, 1H), 6.50 (ddd,  $J = 3.5, 1.7, 0.7$  Hz, 1H), 5.73 (d,  $J = 12.9$  Hz, 1H), 3.75 (s, 3H).  $^{[27]}$  92:8 *Z:E*.

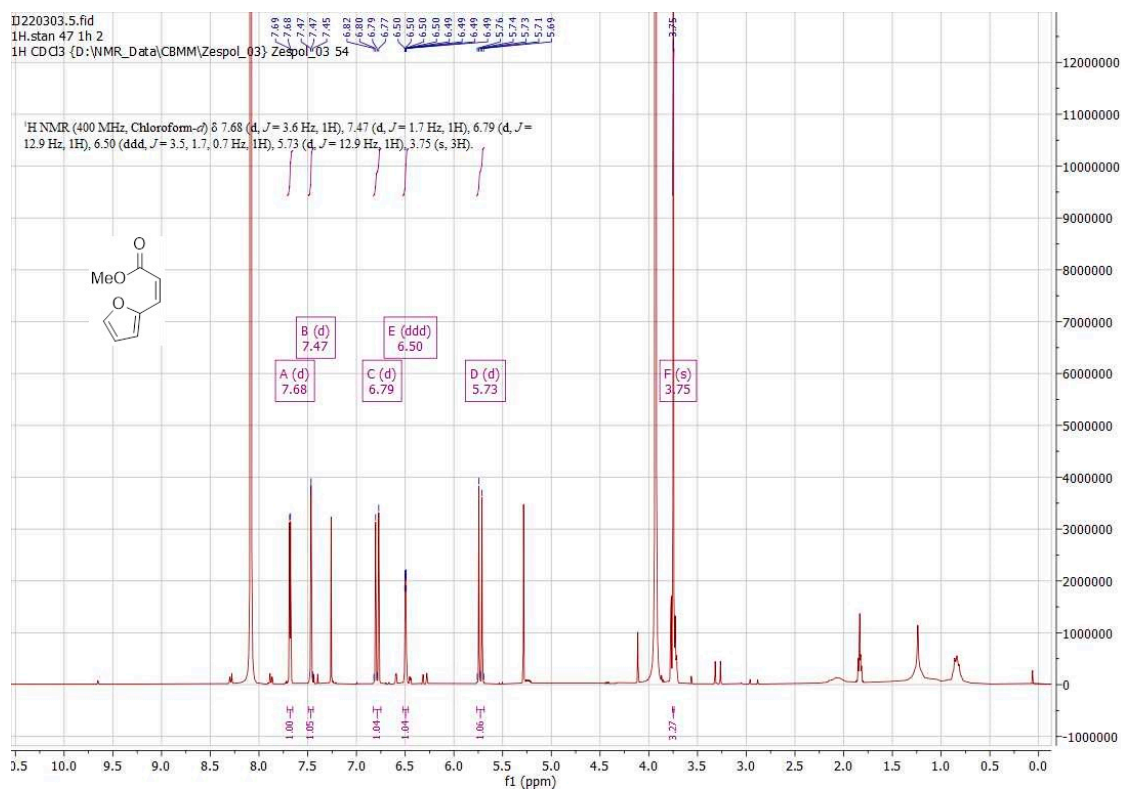

### Z-3ai

$^1\text{H}$  NMR (400 MHz, Chloroform-*d*)  $\delta$  7.52 (d,  $J = 5.1$  Hz, 1H), 7.44 (d,  $J = 3.1$  Hz, 1H), 7.10 (d,  $J = 12.5$  Hz, 1H), 7.05 (dd,  $J = 5.2, 3.7$  Hz, 1H), 5.74 (d,  $J = 12.5$  Hz, 1H), 3.78 (s, 3H).  $^{[28]}$  94:6 *Z:E*.

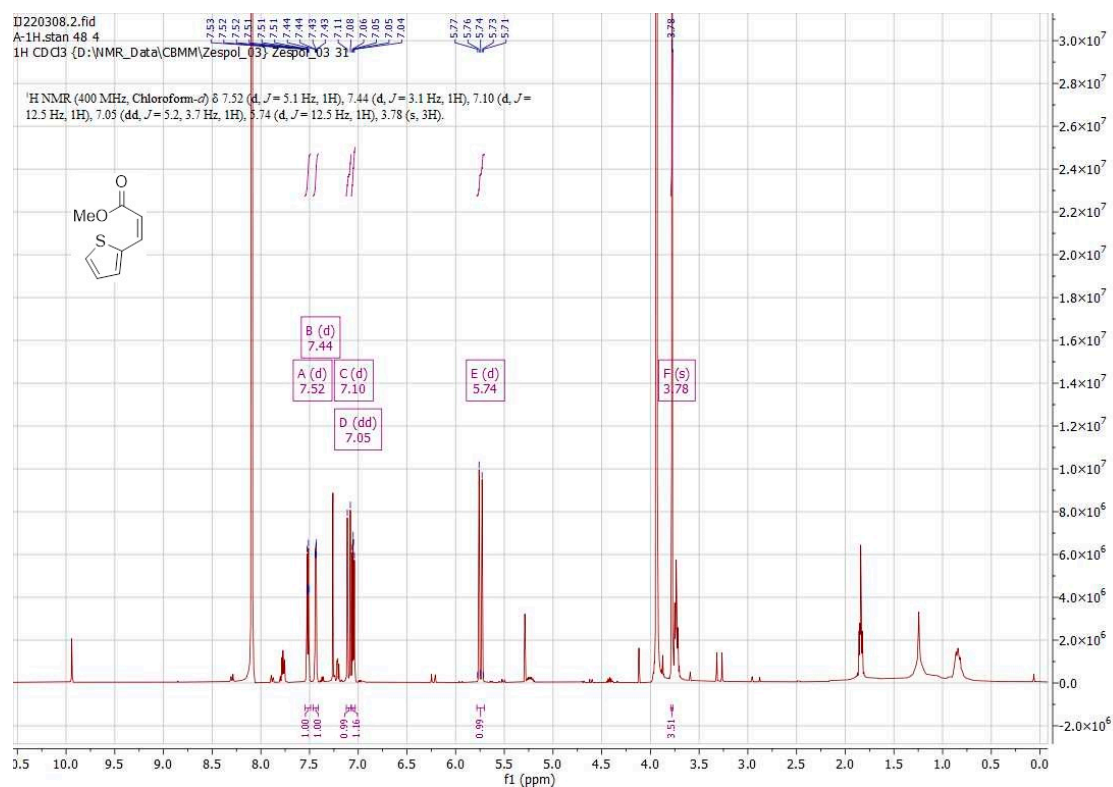



### Z-3aj

$^1\text{H}$  NMR (400 MHz, Chloroform-*d*)  $\delta$  8.18 – 8.11 (m, 1H), 7.60 – 7.49 (m, 2H), 7.48 – 7.27 (m, 3H), 6.92 – 6.68 (m, 2H), 5.73 (d,  $J = 10.9$  Hz, 1H), 3.76 (s, 3H).  $^{[29]}$  89:11 *Z:E*.

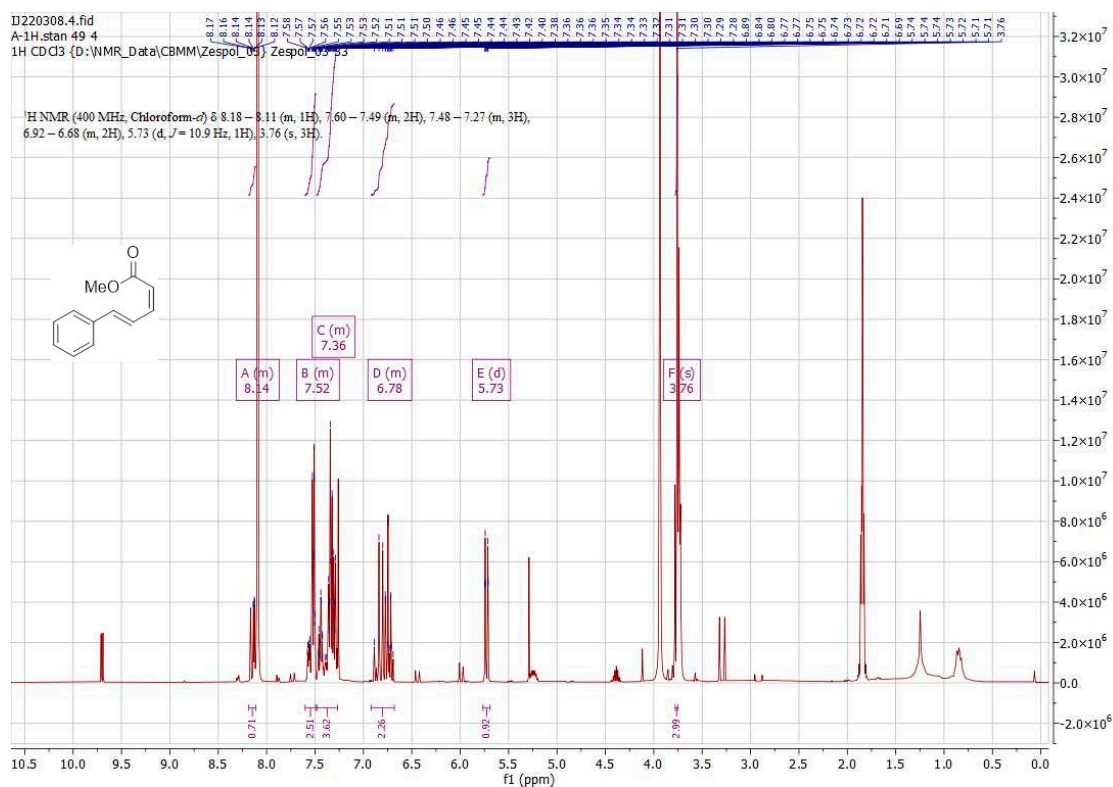

### Z-3ak

$^1\text{H}$  NMR (400 MHz, Chloroform-*d*)  $\delta$  6.03 (dd,  $J = 11.5, 9.9$  Hz, 1H), 5.65 (dd,  $J = 11.5, 1.0$  Hz, 1H), 3.69 (s, 3H), 3.35 – 3.22 (m, 1H), 1.74 – 1.62 (m, 5H), 1.42 – 1.00 (m, 5H).  $^{[30]}$  86:14 *Z:E*.

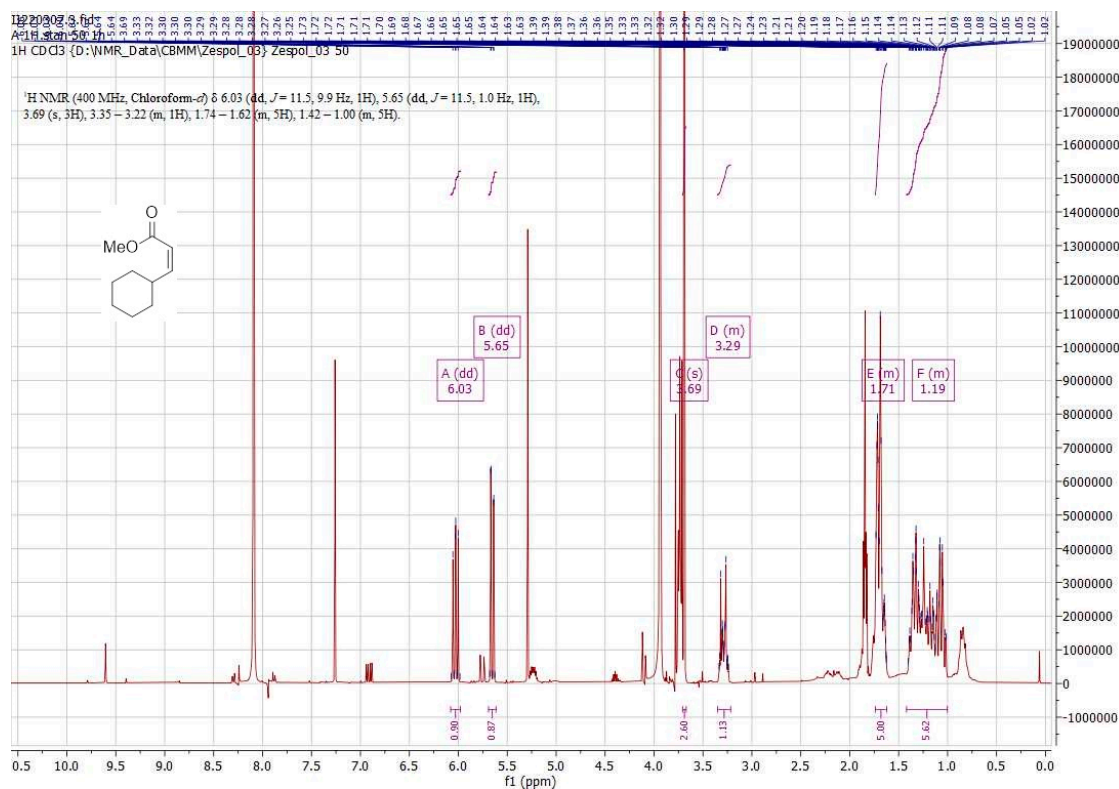

### Z-3al

$^1\text{H}$  NMR (400 MHz, Chloroform- $d$ )  $\delta$  6.25 (dt,  $J = 11.5, 7.5$  Hz, 1H), 5.78 (dt,  $J = 11.5, 1.7$  Hz, 1H), 3.72 (s, 3H), 2.66 (qd,  $J = 7.5, 1.8$  Hz, 2H), 1.49 – 1.39 (m, 2H), 1.38 – 1.23 (m, 8H), 0.89 (t,  $J = 6.7$  Hz, 3H).  $^{[31]}$  88:12 Z:E.

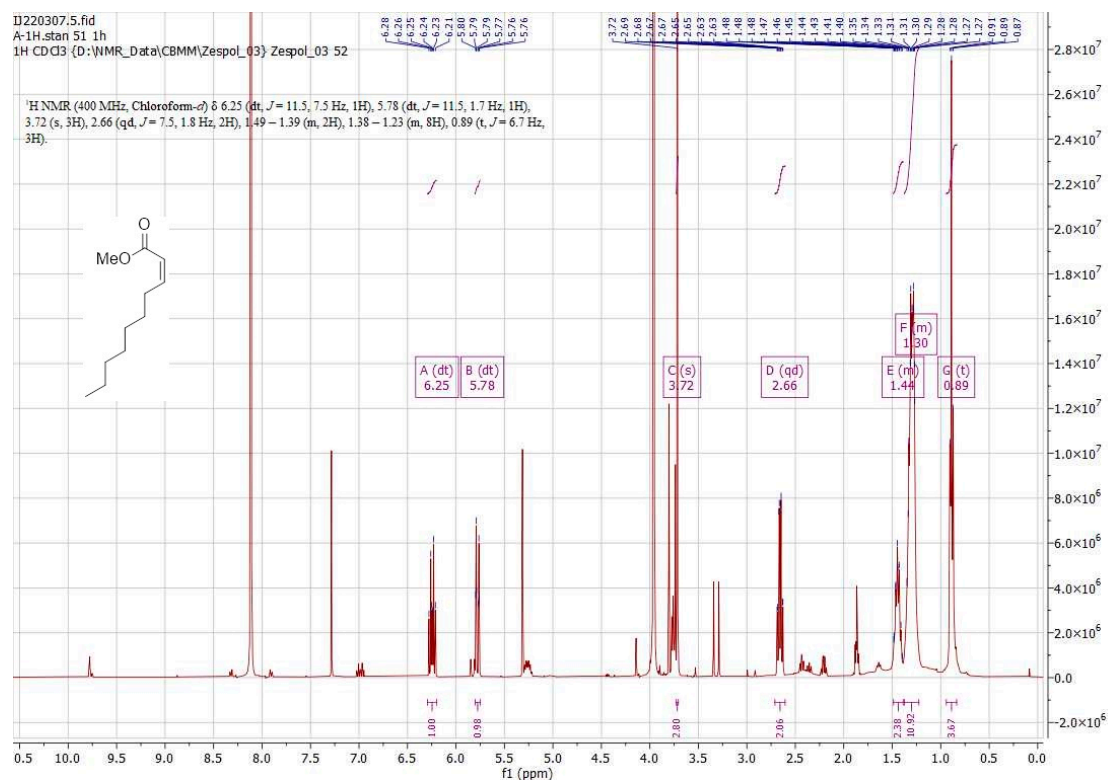

### Z-3am

$^1\text{H}$  NMR (400 MHz, Chloroform- $d$ )  $\delta$  6.23 (dt,  $J = 11.5, 7.5$  Hz, 1H), 5.76 (dt,  $J = 11.5, 1.8$  Hz, 1H), 3.69 (s, 3H), 2.63 (qd,  $J = 7.5, 1.7$  Hz, 2H), 1.50 – 1.38 (m, 2H), 1.36 – 1.18 (m, 4H), 0.87 (t,  $J = 6.3$  Hz, 3H).  $^{[32]}$  88:12 Z:E.

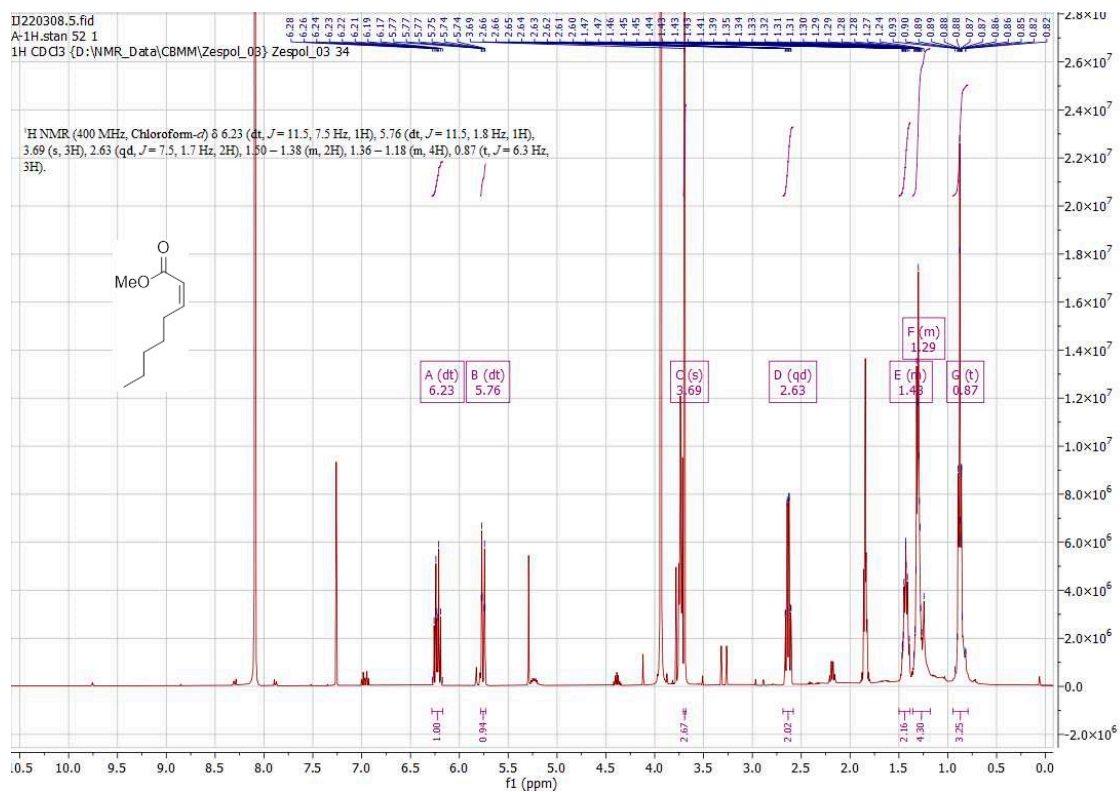

### Z-3ba

$^1\text{H}$  NMR (400 MHz, Chloroform-*d*)  $\delta$  7.60 – 7.53 (m, 2H), 7.38 – 7.29 (m, 3H), 6.94 (d,  $J = 12.5$  Hz, 1H), 5.94 (d,  $J = 12.6$  Hz, 1H), 4.16 (q,  $J = 7.1$  Hz, 2H), 1.23 (t,  $J = 7.1$  Hz, 3H).  $^{[24]}$  97:3 *Z:E*.

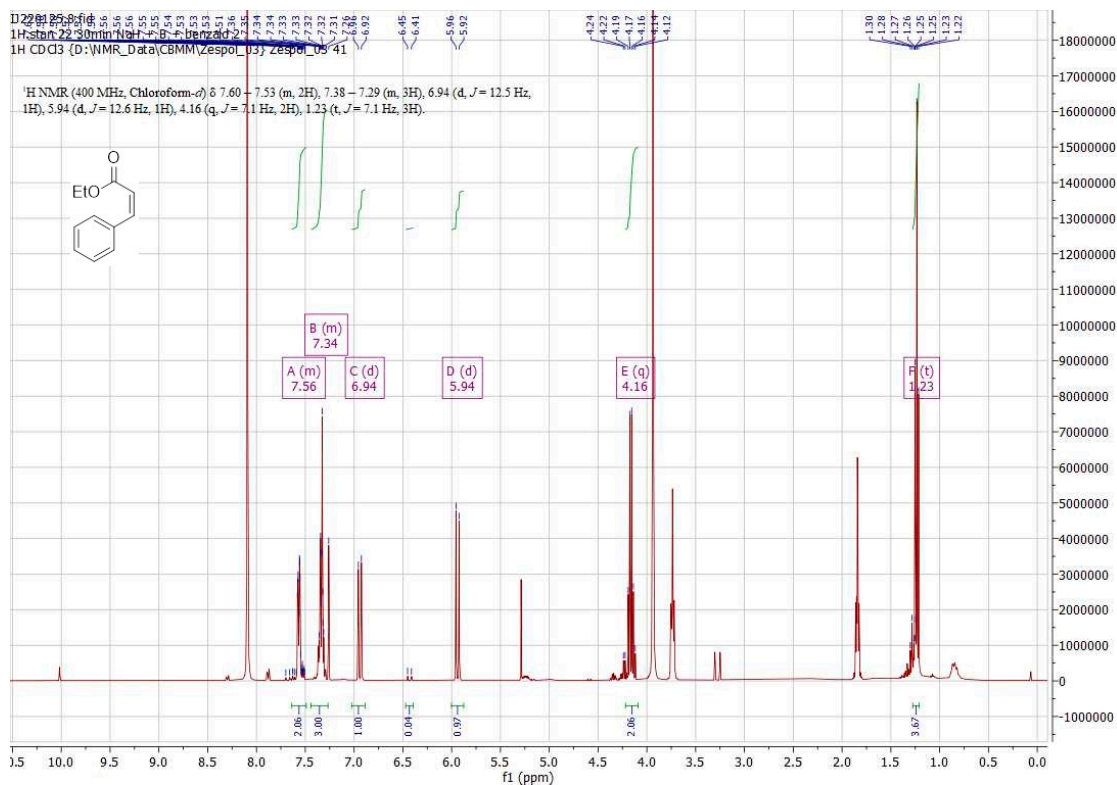

### Z-3bb

$^1\text{H}$  NMR (400 MHz, Chloroform-*d*)  $\delta$  7.51 (d,  $J = 8.1$  Hz, 2H), 7.15 (d,  $J = 7.9$  Hz, 2H), 6.89 (d,  $J = 12.6$  Hz, 1H), 5.88 (d,  $J = 12.7$  Hz, 1H), 4.17 (q,  $J = 7.1$  Hz, 2H), 2.35 (s, 3H), 1.25 (t,  $J = 7.1$  Hz, 3H).  $^{[25]}$  96:4 *Z:E*.

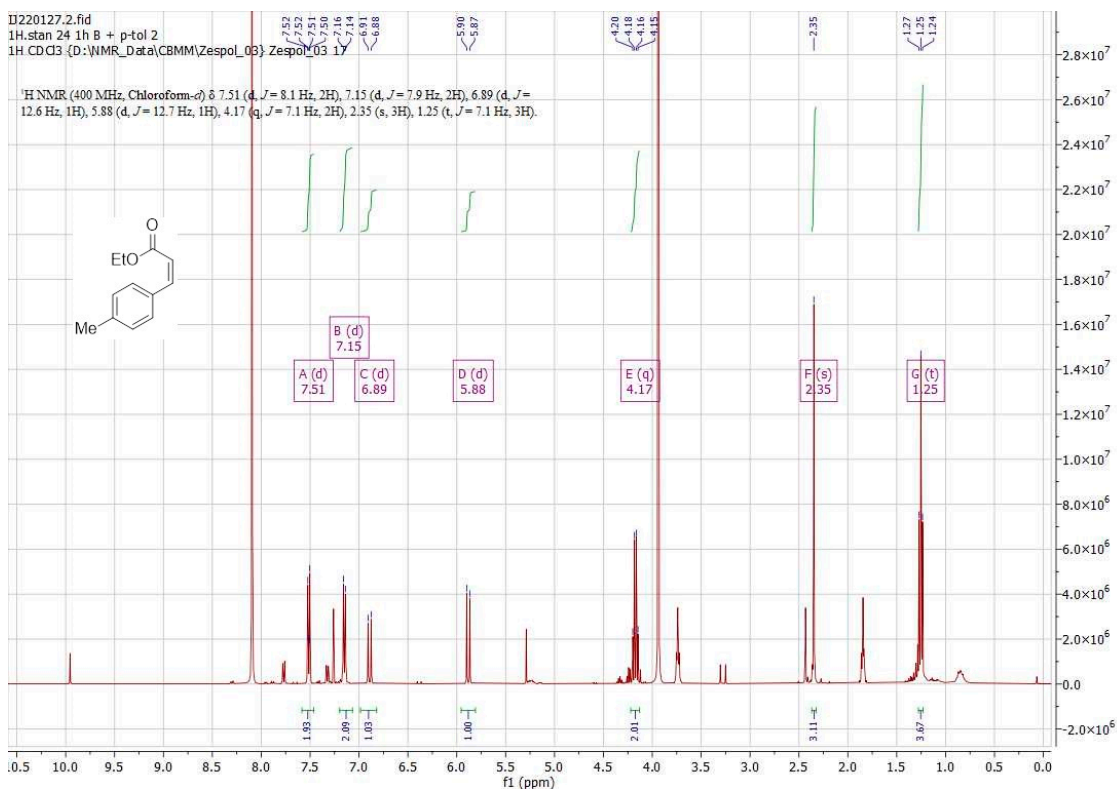



### Z-3bc

$^1\text{H}$  NMR (400 MHz, Chloroform- $d$ )  $\delta$  7.37 (d,  $J$  = 11.2 Hz, 2H), 7.23 (t,  $J$  = 7.7 Hz, 1H), 7.13 (d,  $J$  = 7.6 Hz, 1H), 6.91 (d,  $J$  = 12.6 Hz, 1H), 5.92 (d,  $J$  = 12.6 Hz, 1H), 4.17 (q,  $J$  = 7.1 Hz, 2H), 2.35 (s, 3H), 1.24 (t,  $J$  = 7.1 Hz, 3H).  $^{13}\text{C}$  96:4 Z:E.

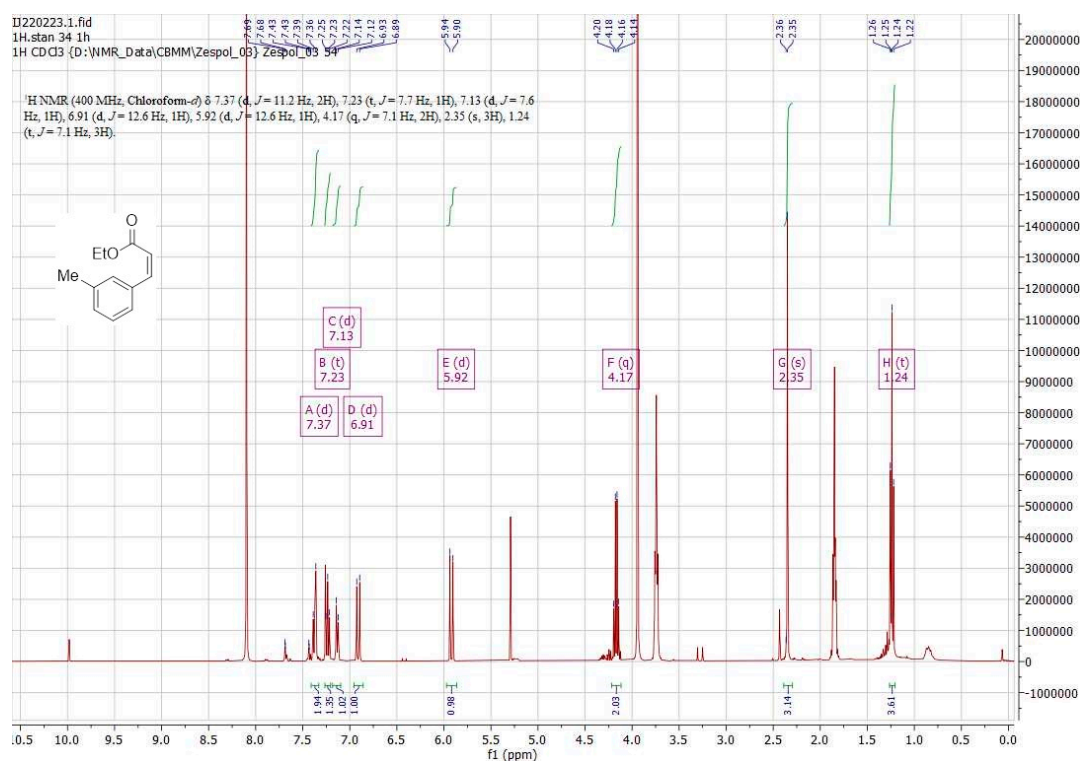

### Z-3bd

$^1\text{H}$  NMR (400 MHz, Chloroform- $d$ )  $\delta$  7.31 (d,  $J$  = 8.2 Hz, 1H), 7.24 – 7.06 (m, 4H), 6.02 (d,  $J$  = 12.2 Hz, 1H), 4.08 (q,  $J$  = 7.1 Hz, 2H), 2.28 (s, 3H), 1.14 (t,  $J$  = 7.1 Hz, 3H).  $^{13}\text{C}$  98:2 Z:E.

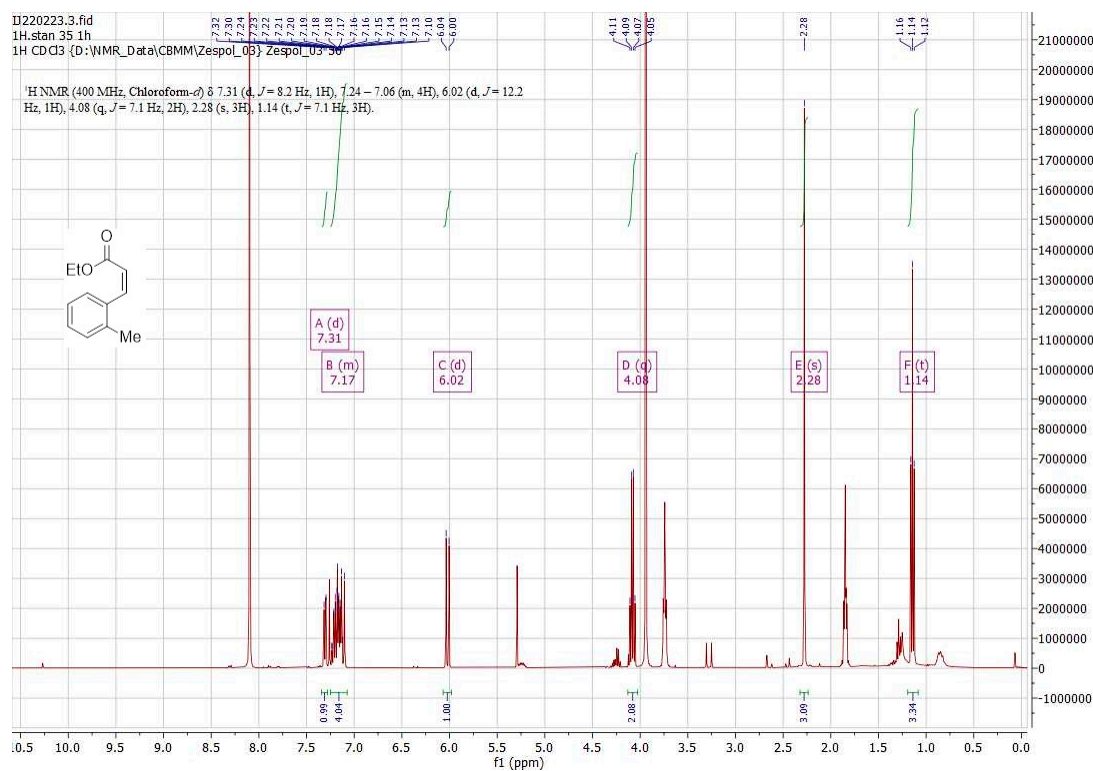

### Z-3be

$^1\text{H}$  NMR (400 MHz, Chloroform-*d*)  $\delta$  7.54 (d,  $J$  = 8.6 Hz, 2H), 7.31 (d,  $J$  = 8.5 Hz, 2H), 6.87 (d,  $J$  = 12.6 Hz, 1H), 5.95 (d,  $J$  = 12.6 Hz, 1H), 4.17 (q,  $J$  = 7.1 Hz, 2H), 1.25 (t,  $J$  = 7.1 Hz, 3H).  $^{[33]}$  96:4 Z:E.

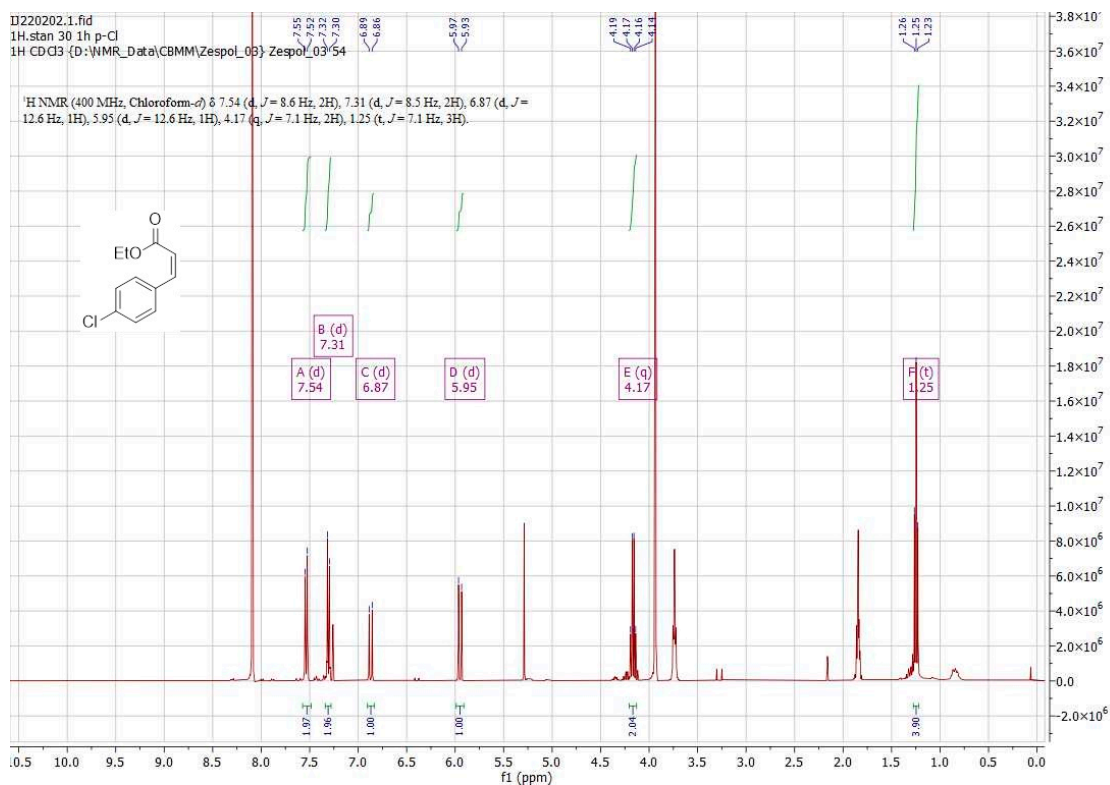

### Z-3bf

$^1\text{H}$  NMR (400 MHz, Chloroform-*d*)  $\delta$  7.49 (s, 4H), 6.88 (d,  $J$  = 12.6 Hz, 1H), 5.98 (d,  $J$  = 12.6 Hz, 1H), 4.19 (q,  $J$  = 7.1 Hz, 2H), 1.27 (t,  $J$  = 7.1 Hz, 3H).  $^{[33]}$  94:6 Z:E.

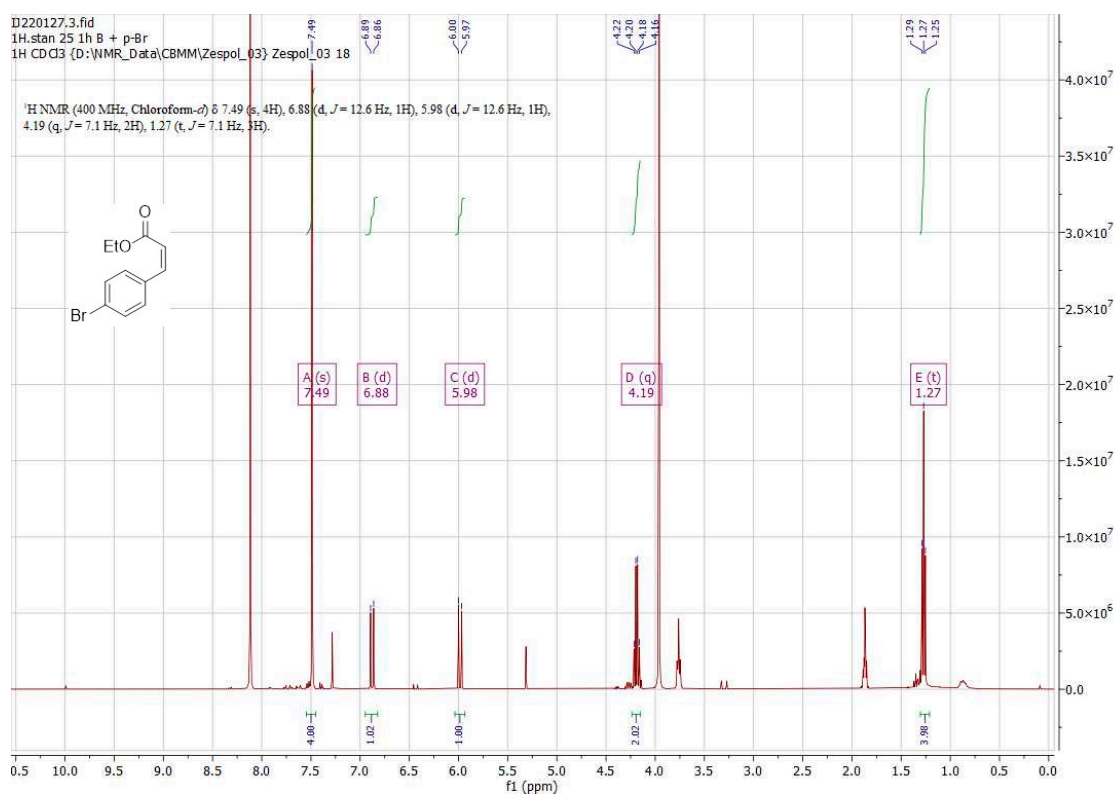

### Z-3bg

$^1\text{H}$  NMR (400 MHz, Chloroform- $d$ )  $\delta$  8.19 (d,  $J = 8.8$  Hz, 2H), 7.66 (d,  $J = 8.6$  Hz, 2H), 7.00 (d,  $J = 12.5$  Hz, 1H), 6.12 (d,  $J = 12.5$  Hz, 1H), 4.16 (q,  $J = 7.1$  Hz, 2H), 1.23 (t,  $J = 7.1$  Hz, 3H).  $^{[33]}$  95:5 Z:E.

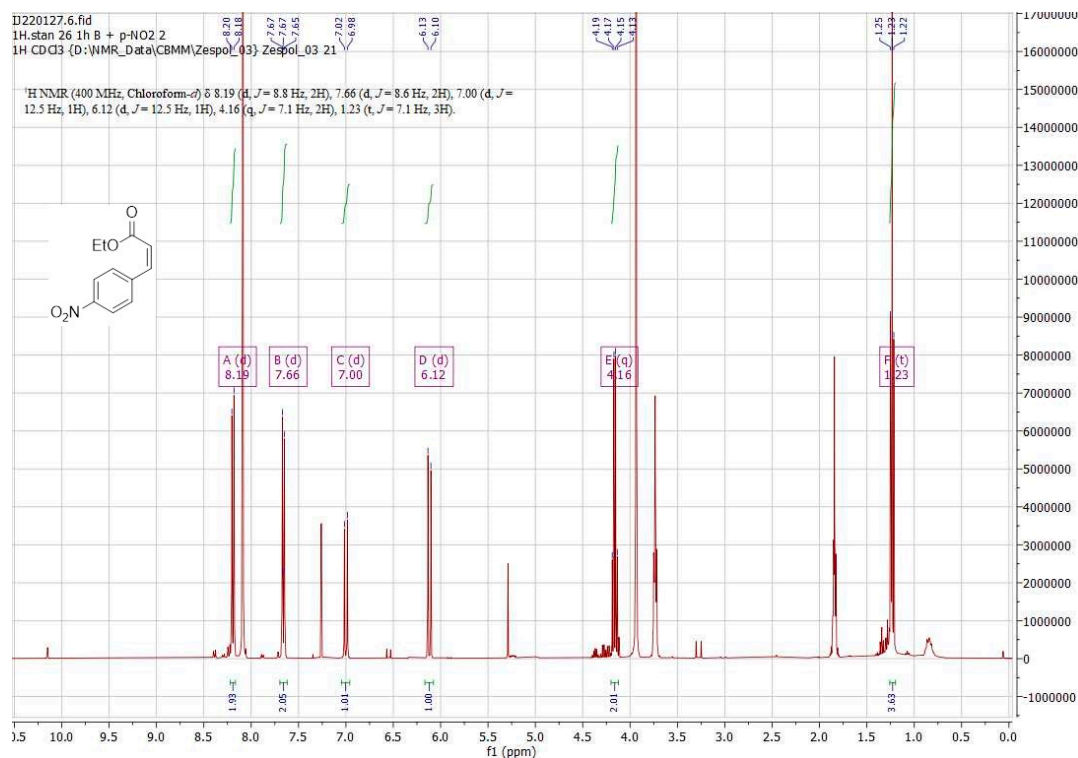

### Z-3bh

$^1\text{H}$  NMR (400 MHz, Chloroform- $d$ )  $\delta$  7.66 (d,  $J = 3.5$  Hz, 1H), 7.46 (d,  $J = 1.8$  Hz, 1H), 6.78 (d,  $J = 12.9$  Hz, 1H), 6.49 (ddd,  $J = 3.6, 1.8, 0.7$  Hz, 1H), 5.72 (d,  $J = 12.9$  Hz, 1H), 4.21 (q,  $J = 7.1$  Hz, 2H), 1.31 (t,  $J = 7.1$  Hz, 3H).  $^{[33]}$  95:5 Z:E.

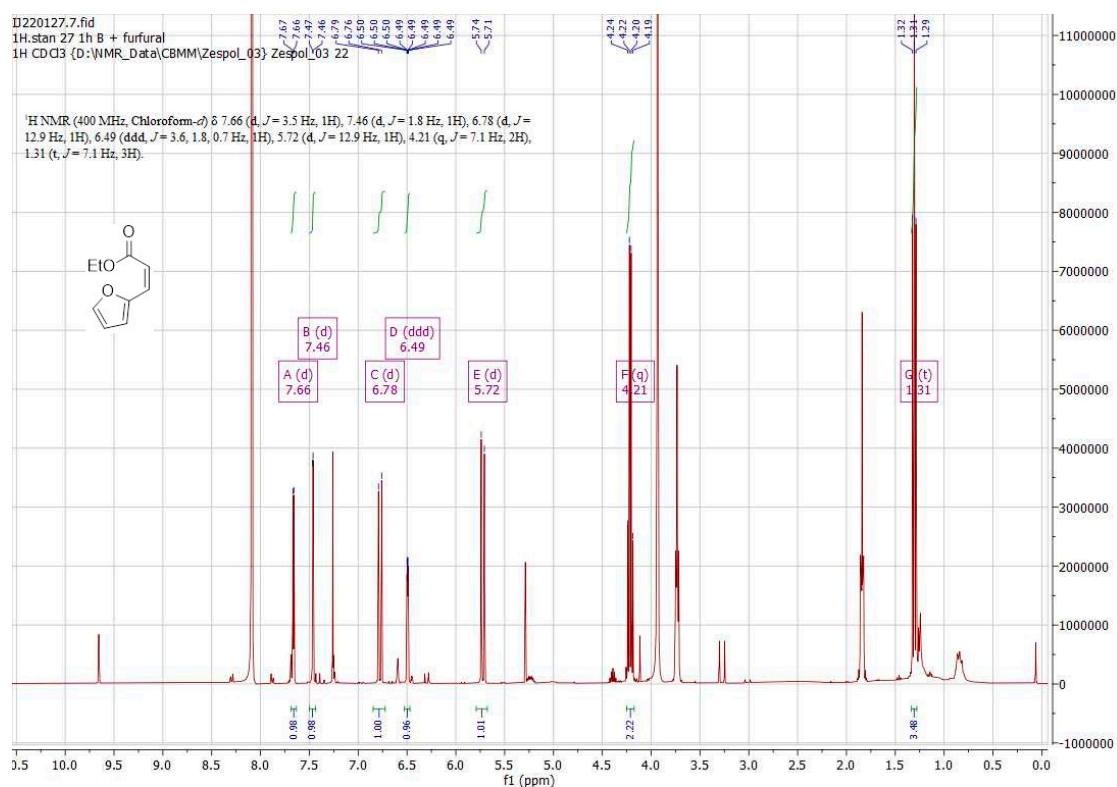

### Z-3bi

$^1\text{H}$  NMR (400 MHz, Chloroform-*d*)  $\delta$  7.50 (d,  $J = 5.1$  Hz, 1H), 7.42 (d,  $J = 3.7$  Hz, 1H), 7.07 (d,  $J = 12.1$  Hz, 1H), 7.03 (dd,  $J = 5.2, 3.7$  Hz, 1H), 5.72 (d,  $J = 12.5$  Hz, 1H), 4.23 (q,  $J = 7.1$  Hz, 2H), 1.31 (t,  $J = 7.1$  Hz, 3H).  $^{[34]}$  95:5 *Z:E*.

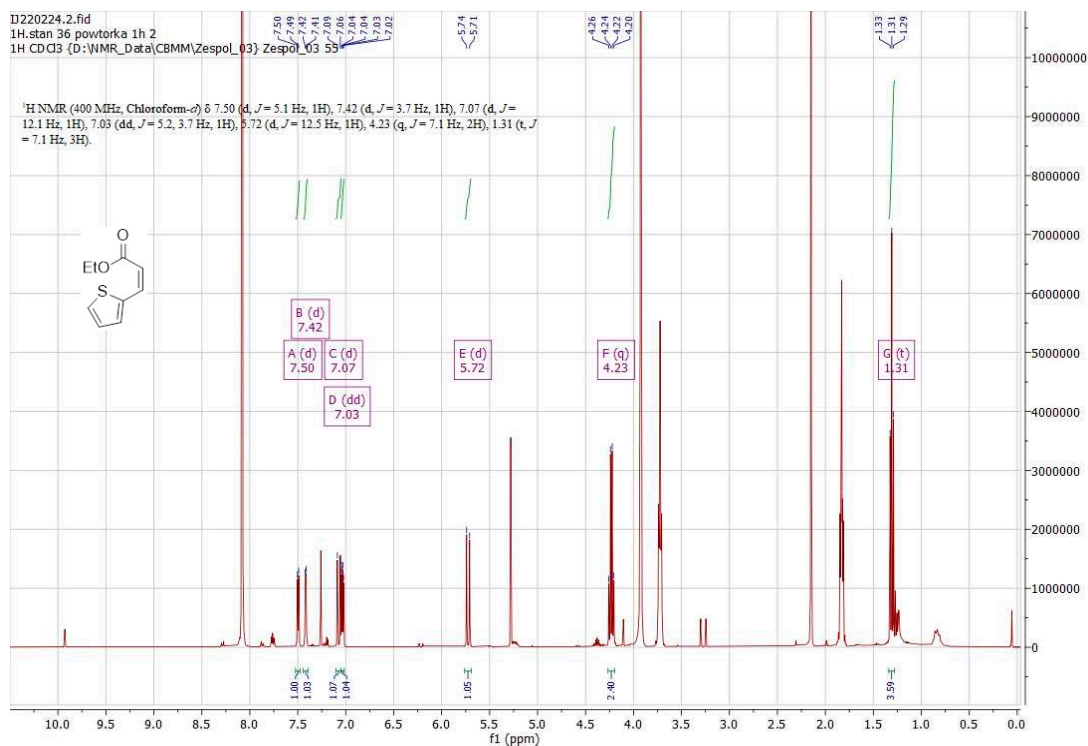

### Z-3bj

$^1\text{H}$  NMR (400 MHz, Chloroform-*d*)  $\delta$  8.14 (dd,  $J = 16.1, 11.7$  Hz, 1H), 7.51 (d,  $J = 7.9$  Hz, 2H), 7.37 – 7.27 (m, 3H), 6.81 (d,  $J = 15.7$  Hz, 1H), 6.72 (d,  $J = 11.4$  Hz, 1H), 5.72 (d,  $J = 11.2$  Hz, 1H), 4.22 (q,  $J = 7.1$  Hz, 2H), 1.32 (t,  $J = 7.1$  Hz, 3H).  $^{[35]}$  91:9 *Z:E*.

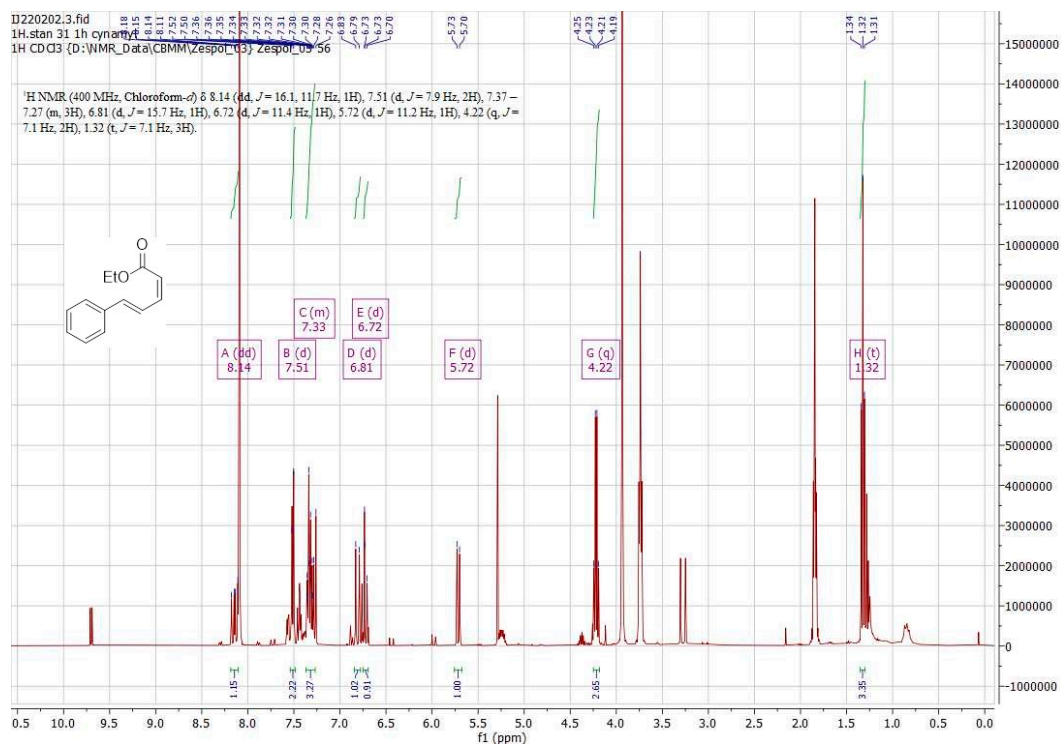

### Z-3bk

$^1\text{H}$  NMR (400 MHz, Chloroform- $d$ )  $\delta$  6.01 (dd,  $J = 11.5, 9.8$  Hz, 1H), 5.64 (dd,  $J = 11.5, 1.1$  Hz, 1H), 4.15 (q,  $J = 7.1$  Hz, 2H), 3.34 – 3.21 (m, 1H), 1.78 – 1.66 (m, 5H), 1.40 – 1.29 (m, 2H), 1.28 (t,  $J = 7.2$  Hz, 3H), 1.27 – 0.99 (m, 3H).  $^{[36]}$  87:13 Z:E.

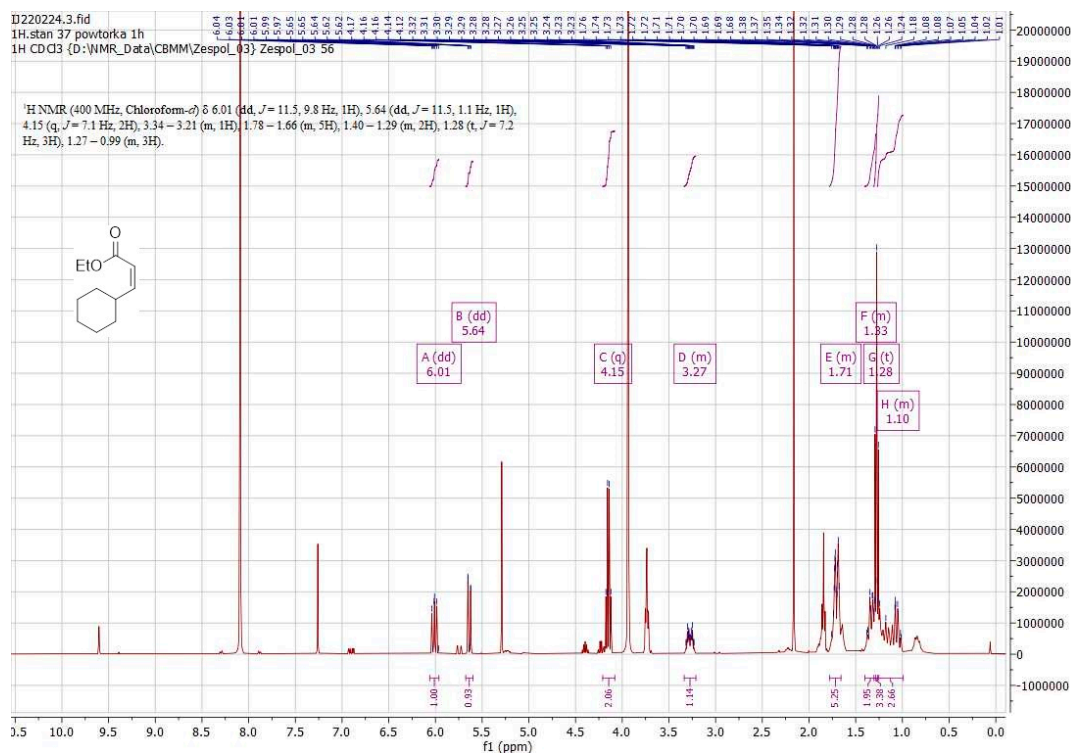

### Z-3bl

$^1\text{H}$  NMR (400 MHz, Chloroform- $d$ )  $\delta$  6.20 (dt,  $J = 11.5, 7.5$  Hz, 1H), 5.74 (dt,  $J = 11.5, 1.8$  Hz, 1H), 4.15 (q,  $J = 7.1$  Hz, 2H), 2.63 (qd,  $J = 7.5, 1.7$  Hz, 2H), 1.42 (dq,  $J = 14.5, 7.2$  Hz, 2H), 1.31 – 1.22 (m, 11H), 0.86 (t,  $J = 6.8$  Hz, 3H)  $^{[15]}$  88:12 Z:E.

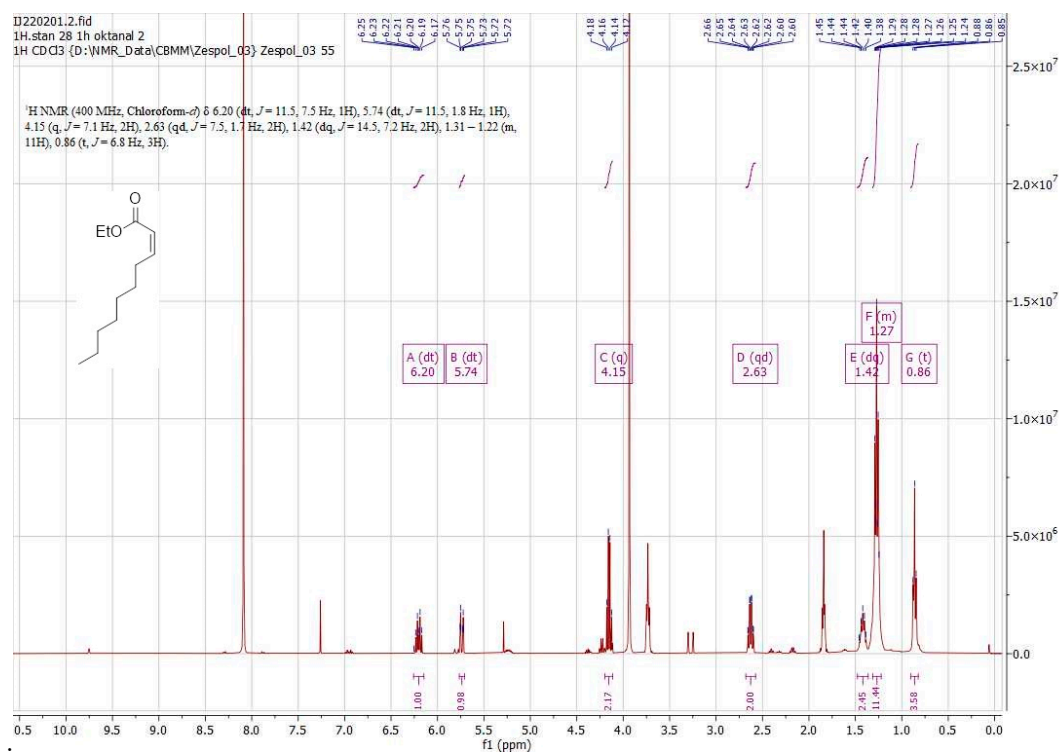



### Z-3bm

$^1\text{H}$  NMR (400 MHz, Chloroform- $d$ )  $\delta$  6.23 (dt,  $J = 11.6, 7.5$  Hz, 1H), 5.77 (dt,  $J = 11.5, 1.7$  Hz, 1H), 4.18 (q,  $J = 7.1$  Hz, 2H), 2.65 (qd,  $J = 7.6, 1.7$  Hz, 2H), 1.51 – 1.41 (m, 2H), 1.37 – 1.25 (m, 7H), 0.90 (t,  $J = 6.7$  Hz, 3H). <sup>[38]</sup> 88:12 Z:E.

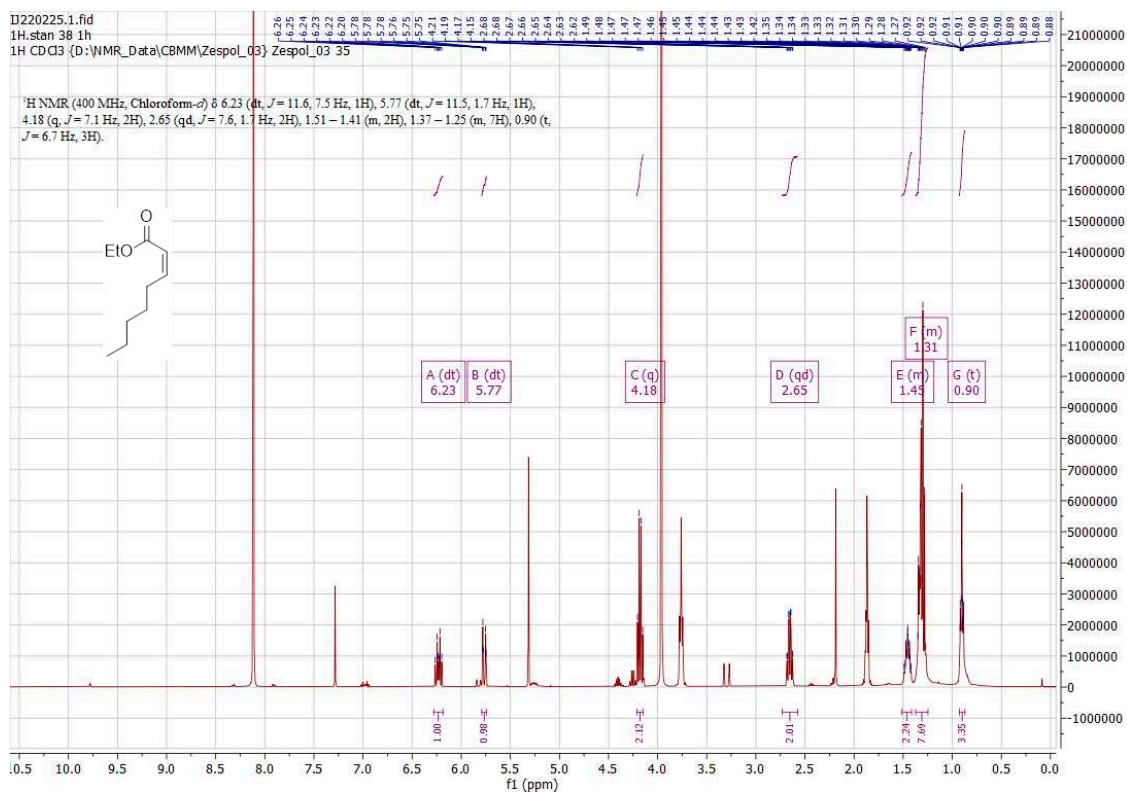

Supplement: s1 [file s1]
